# Supplementary material
Source: ML conference proceedings conference paper supplement (https://openreview.net/forum?id=ezBH9WE9s2)
Supplement: supplementary_material [file attachment]

| Output                                                                              | Input                                                                                | Glyph & Position                                                                      | Caption                                                                                              |
|-------------------------------------------------------------------------------------|--------------------------------------------------------------------------------------|---------------------------------------------------------------------------------------|------------------------------------------------------------------------------------------------------|
|    |    |    | photo of a caramel macchiato coffee, top-down perspective, with "Any" "Text" written using chocolate |
|    |    |    | A delicate square cake, cream and fruit, with "CHEERS" "to the" and "GRADUATE" written on it         |
|   |   |   | A mug with a poem written on it, the content is "花落知多少" "夜来风雨声" "处处闻啼鸟" "春眠不觉晓"                      |
|  |  |  | A beautiful crayon drawing with planets, astronauts, and spaceships, it says "去火星旅行", "王小明", "11月1日" |

Figure 1: Examples to showcase the input details when generate images using AnyText

| Origin                                                                              | Glyph                                                                               | Position                                                                              | Caption                                                                                                                                      |
|-------------------------------------------------------------------------------------|-------------------------------------------------------------------------------------|---------------------------------------------------------------------------------------|----------------------------------------------------------------------------------------------------------------------------------------------|
|     |     |     | hell hath no fury like a woman sleep deprived pullover, texts that says “DEPRIVED”, “SLEEP”, “WOMAN”, “likea”, “FURY”, “HELL”, “HATH”, “NO”. |
|    |    |    | real men play the ukulele coffee mug, content of the text in the graphic is “ukulele”, “play”, “the”, “men”, “real”.                         |
|    |    |    | owl always love you, captions shown in the snapshot are “you”, “love”, “always”, “owl” .                                                     |
|   |   |   | a book with the title shrinky arts, captions are “8x10”, “Shrinkable”, “Clear”, “ARTS”, “SHRINKY” .                                          |
|  |  |  | a purple sign with the words birthday parties for kids, texts that says “Kids”, “Parties”, “for”, “Birthday”.                                |

Figure 2: The glyph, position and caption of examples in English from the AnyText-benchmark

| Origin                                                                              | Glyph                                                                               | Position                                                                              | Caption                                                                                                                         |
|-------------------------------------------------------------------------------------|-------------------------------------------------------------------------------------|---------------------------------------------------------------------------------------|---------------------------------------------------------------------------------------------------------------------------------|
|    |     |     | a chinese restaurant with a sign that says jing bai hospital, texts that says “京滨招待所” .                                         |
|    |    |    | chinese education logo, content and position of the texts are”诚”, “诚技教育”, “CHENGJLEDUCATION” .                                  |
|    |    |    | a man in a suit standing at a podium in front of a screen, the written materials on the picture: “口市人民政府康美药业股份有”, “股份制医院组建启动” . |
|   |   |   | a boy holding up a sign with chinese writing, that reads “武汉加油!”, “中国加油!”, “晟涵”, “马尾实小三年 四班” .                                  |
|  |  |  | wooden house number plaque with flowers, the written materials on the picture: “1086”, “支持定制” .                                 |

Figure 3: The glyph, position and caption of examples in Chinese from the AnyText-benchmark

Table 1: Quantitative comparison of AnyText and competing methods. In order to make the evaluation results more objective and fair, we replaced the OCR model from PPOCR\_v3 with DuGuang\_OCR. The green and red values represent the original and updated metrics, respectively.

| Methods                       | English   |        |       | Chinese   |        |       |
|-------------------------------|-----------|--------|-------|-----------|--------|-------|
|                               | Sen. Acc↑ | NED↑   | FID↓  | Sen. Acc↑ | NED↑   | FID↓  |
| ControlNet                    | 0.6027    | 0.8134 | 49.43 | 0.3742    | 0.6428 | 52.64 |
|                               | 0.5910    | 0.8061 |       | 0.3727    | 0.6355 |       |
| TextDiffuser                  | 0.5879    | 0.7974 | 43.91 | 0.0596    | 0.1233 | 52.55 |
|                               | 0.5878    | 0.7958 |       | 0.0600    | 0.1248 |       |
| GlyphControl                  | 0.3379    | 0.6488 | 36.49 | 0.0324    | 0.0807 | 32.04 |
|                               | 0.3382    | 0.6390 |       | 0.0301    | 0.0775 |       |
| GlyphControl<br>(TextCaps-5k) | 0.4906    | 0.7392 | 43.35 | 0.0406    | 0.0915 | 48.17 |
|                               | 0.4933    | 0.7324 |       | 0.0412    | 0.0939 |       |
| AnyText                       | 0.6686    | 0.8634 | 35.71 | 0.7090    | 0.8877 | 28.69 |
|                               | 0.6509    | 0.8541 |       | 0.6646    | 0.8274 |       |



Table 2: Ablation experiments of AnyText on a small-scale dataset from AnyWord-3M. We have added two additional experiments: Exp. 3 and Exp. 4. In Exp. 3, we replaced the OCR model in the text embedding module with CLIP vision model (vit), and in Exp. 4, we replaced it with a stacked convolutional module (conv). Additionally, all ablation experiments’ Sen. Acc and NED metrics were recalculated using the DuGuang\_OCR model.

| Exp. No | Editing | Position | Text Embedding | Perceptual Loss | $\lambda$ | Chinese             |                |
|---------|---------|----------|----------------|-----------------|-----------|---------------------|----------------|
|         |         |          |                |                 |           | Sen. Acc $\uparrow$ | NED $\uparrow$ |
| 1       | ✓       | ✓        | ✗              | ✗               | -         | 0.1552              | 0.4070         |
| 2       | ✗       | ✓        | ✗              | ✗               | -         | 0.2024              | 0.4649         |
| 3       | ✗       | ✓        | vit            | ✗               | -         | 0.1416              | 0.3809         |
| 4       | ✗       | ✓        | conv           | ✗               | -         | 0.1864              | 0.4402         |
| 5       | ✗       | ✓        | ocr            | ✗               | -         | 0.4595              | 0.7072         |
| 6       | ✗       | ✗        | ocr            | ✗               | -         | 0.4472              | 0.6974         |
| 7       | ✗       | ✓        | ocr            | ✓               | 0.003     | 0.4848              | 0.7353         |
| 8       | ✗       | ✓        | ocr            | ✓               | 0.01      | 0.4996              | 0.7457         |
| 9       | ✗       | ✓        | ocr            | ✓               | 0.03      | 0.4659              | 0.7286         |



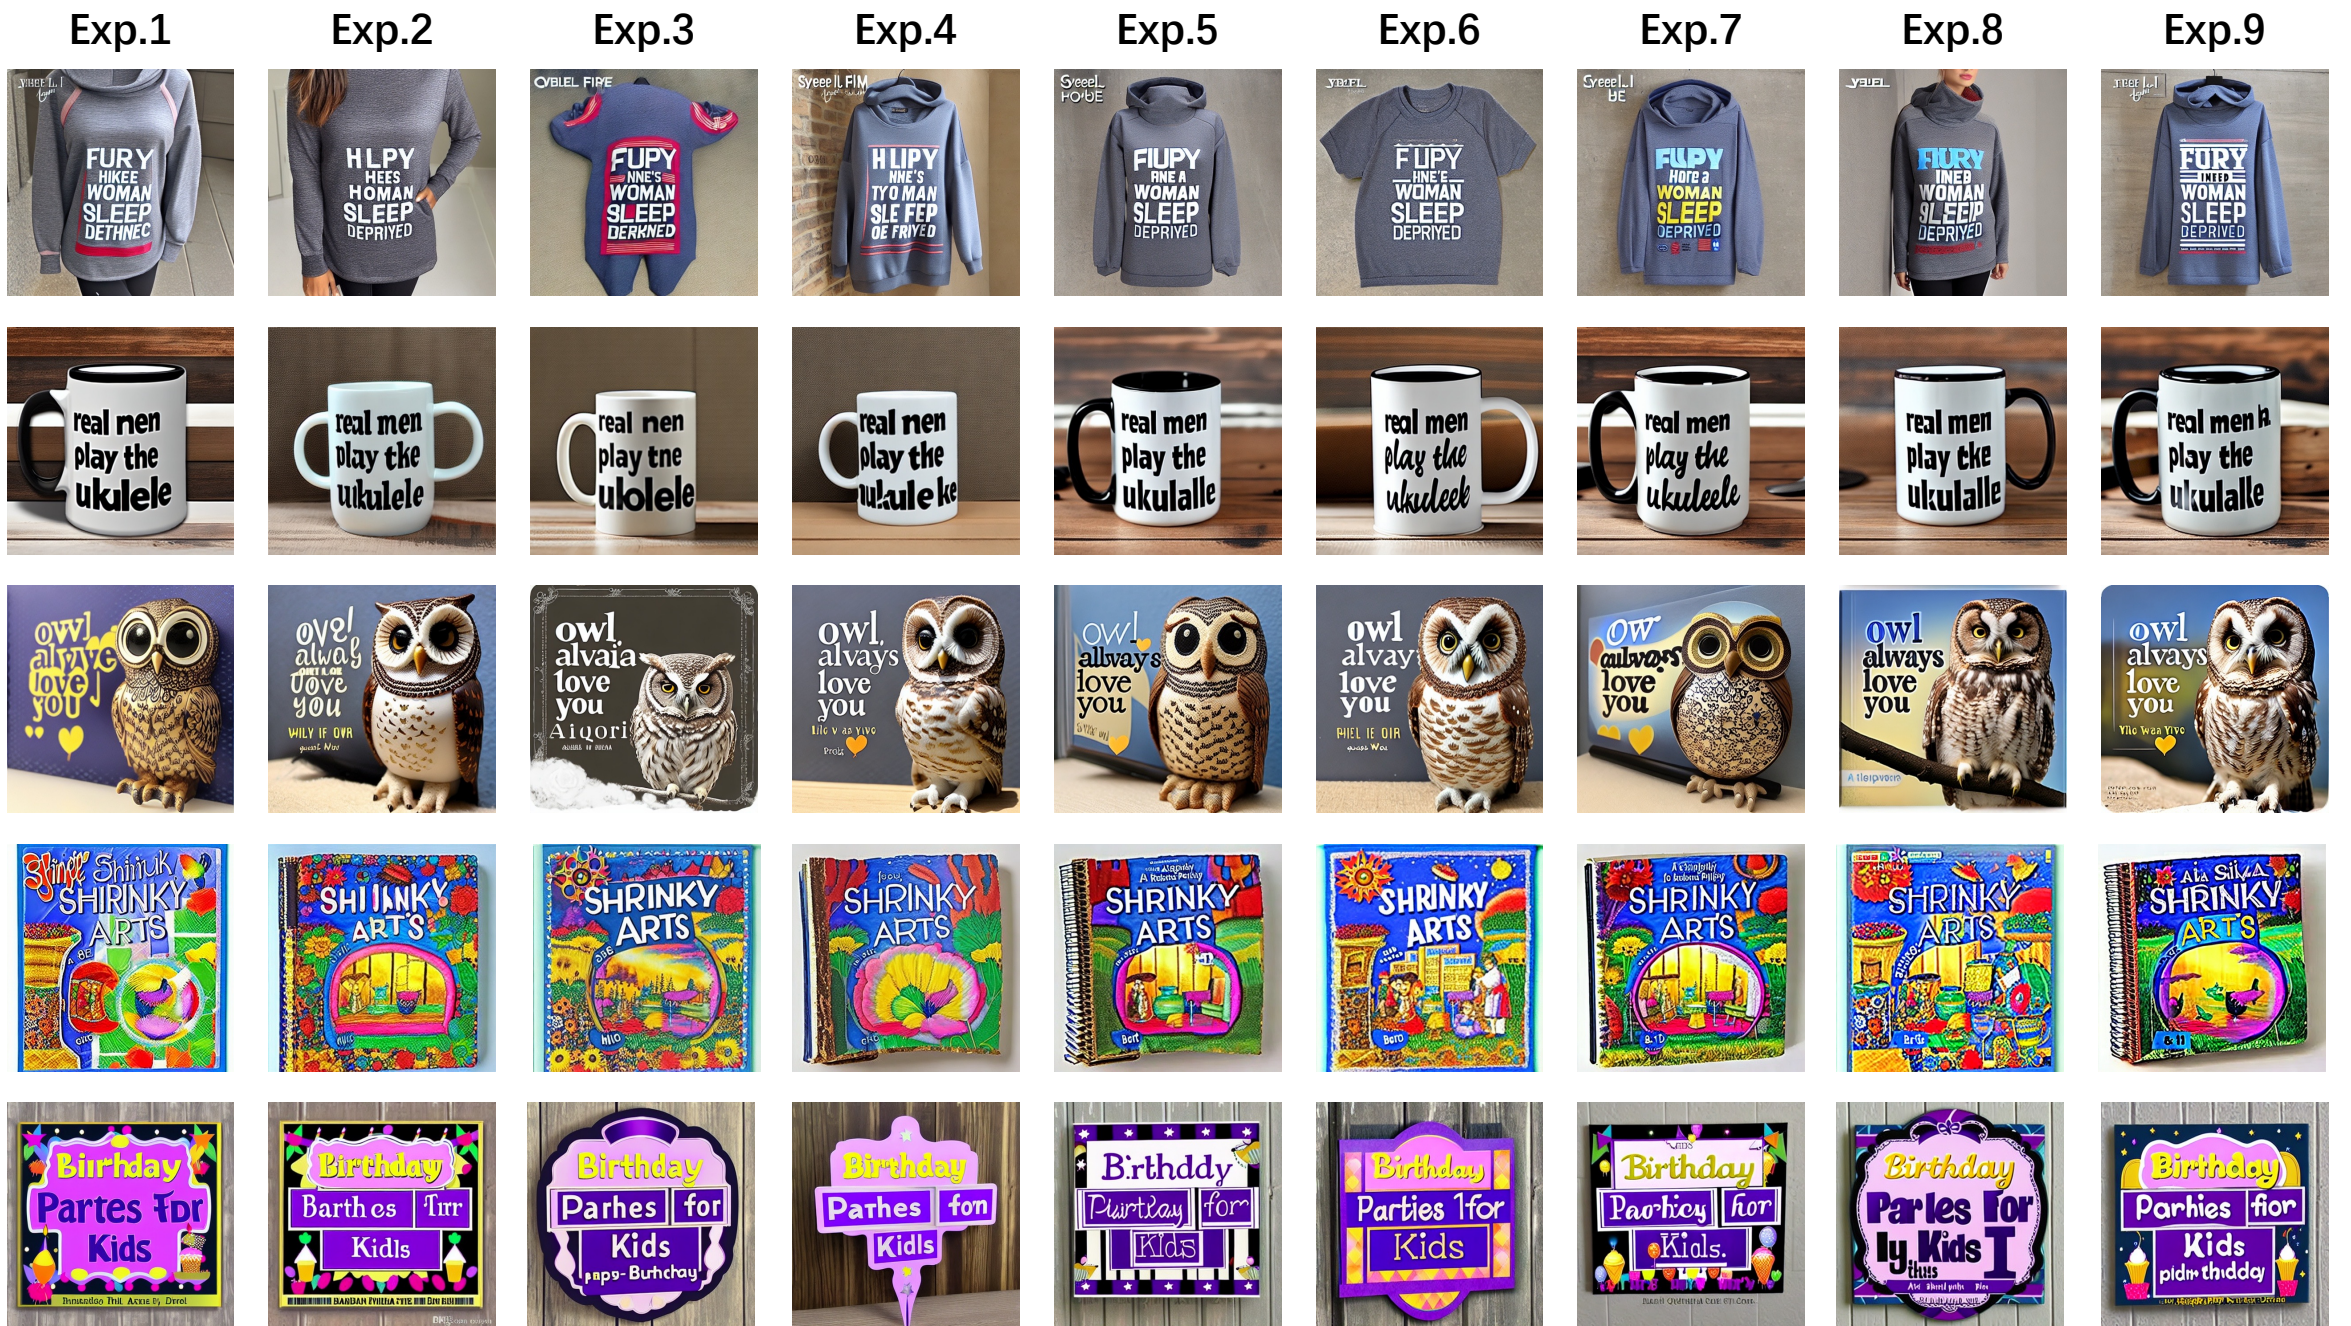

Figure 4: Qualitative comparison of ablation experiments from the AnyText-benchmark in English



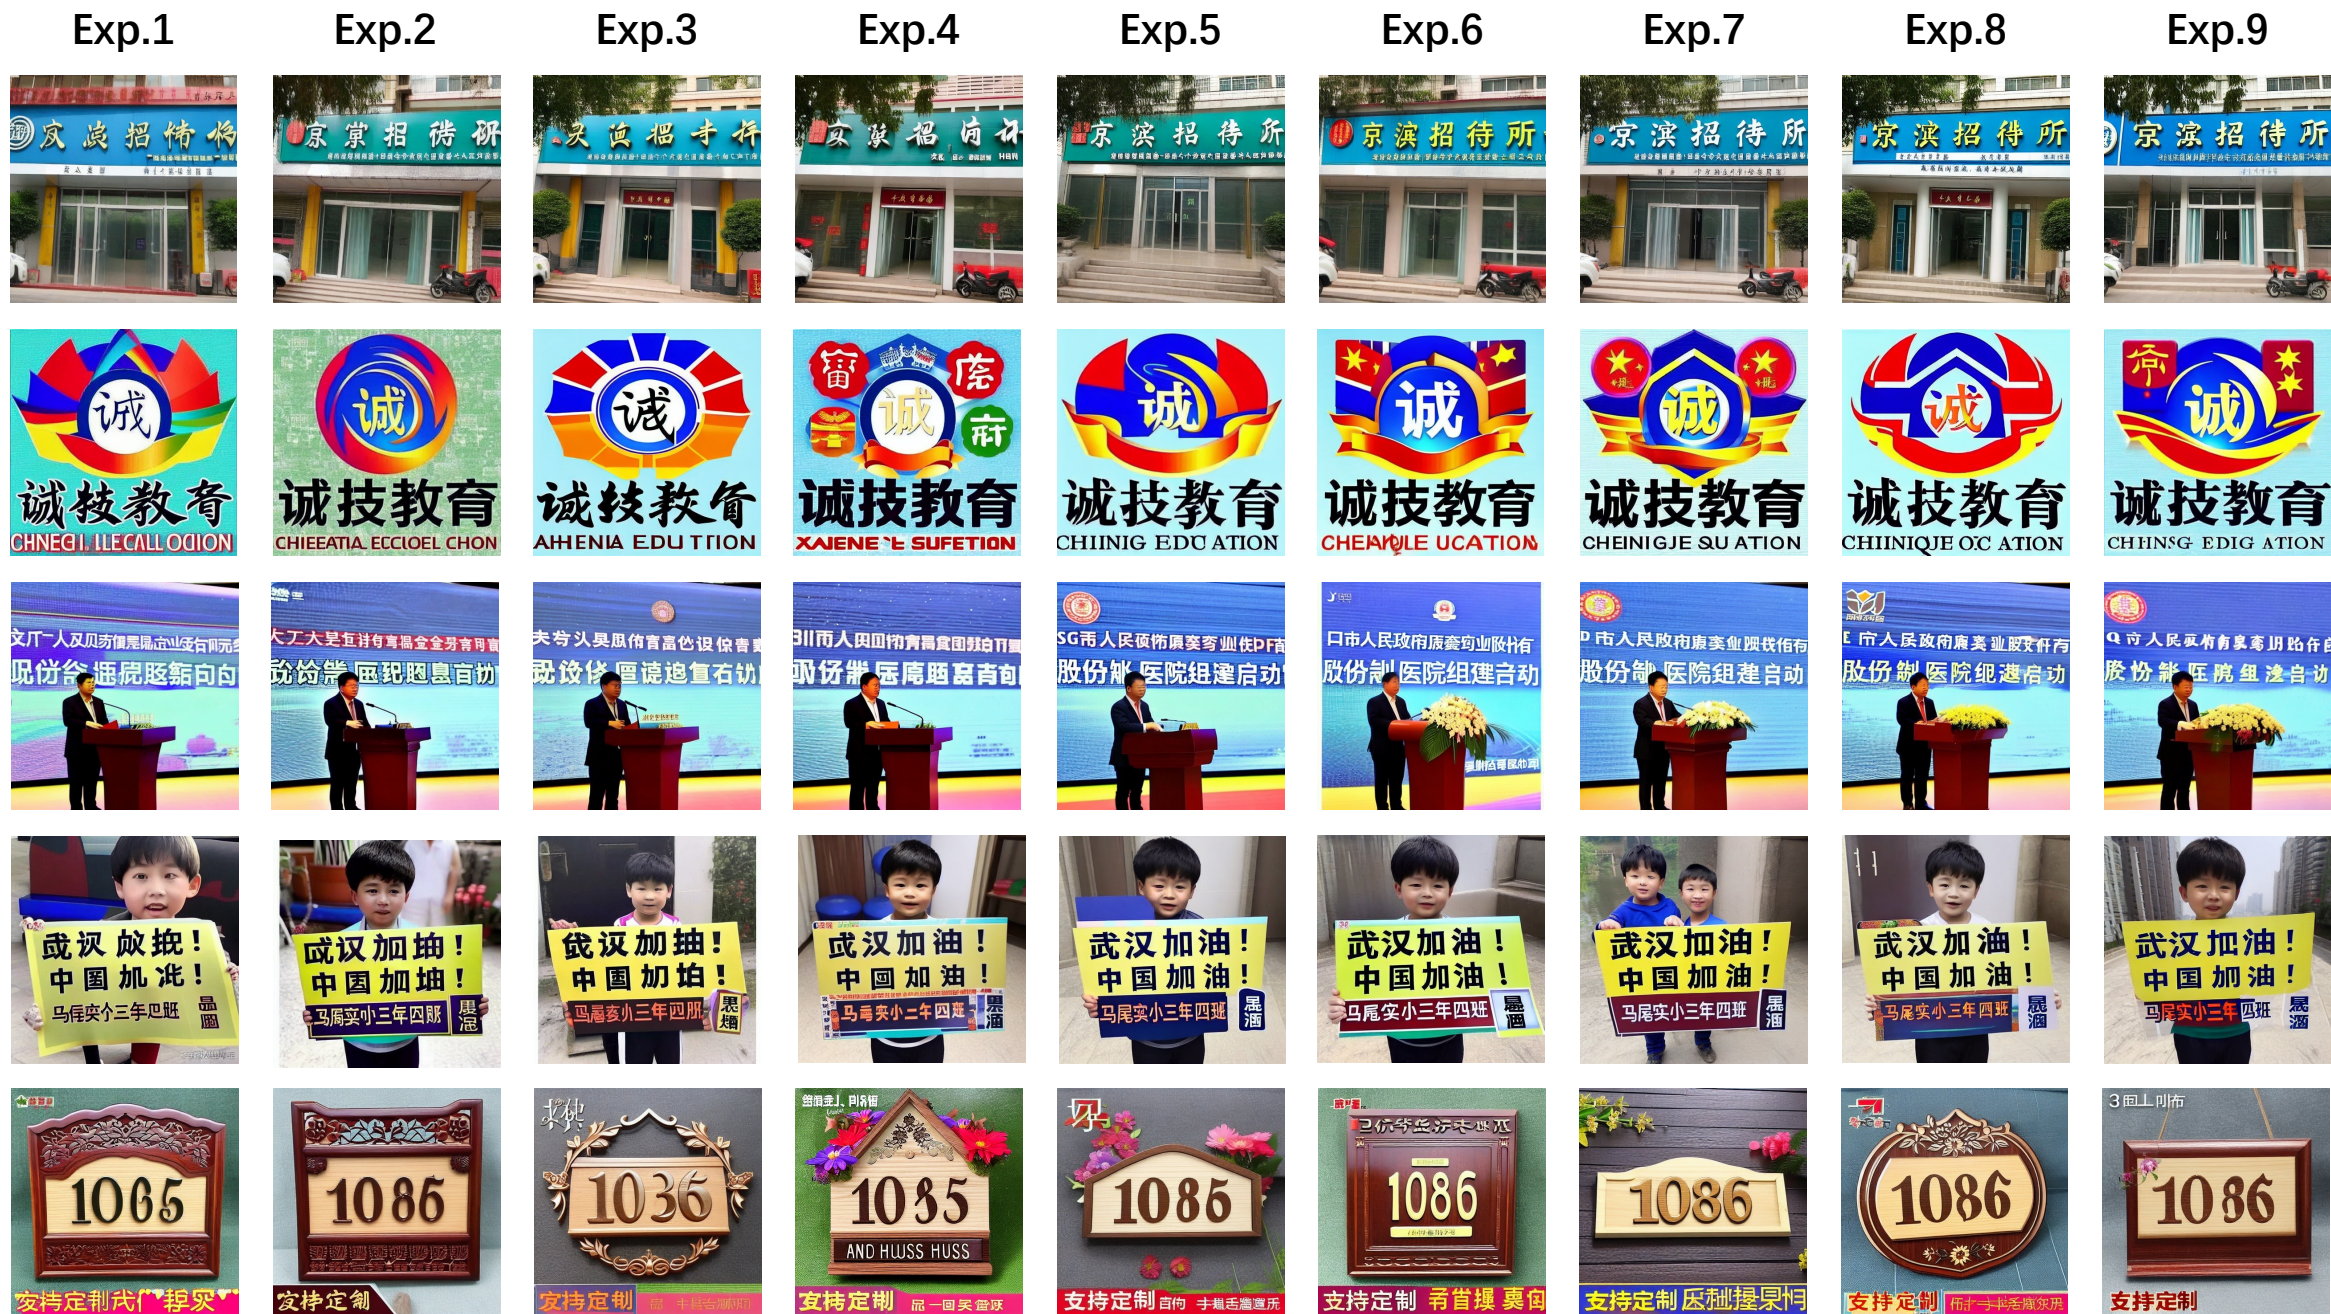

Figure 5: Qualitative comparison of ablation experiments from the AnyText-benchmark in Chinese



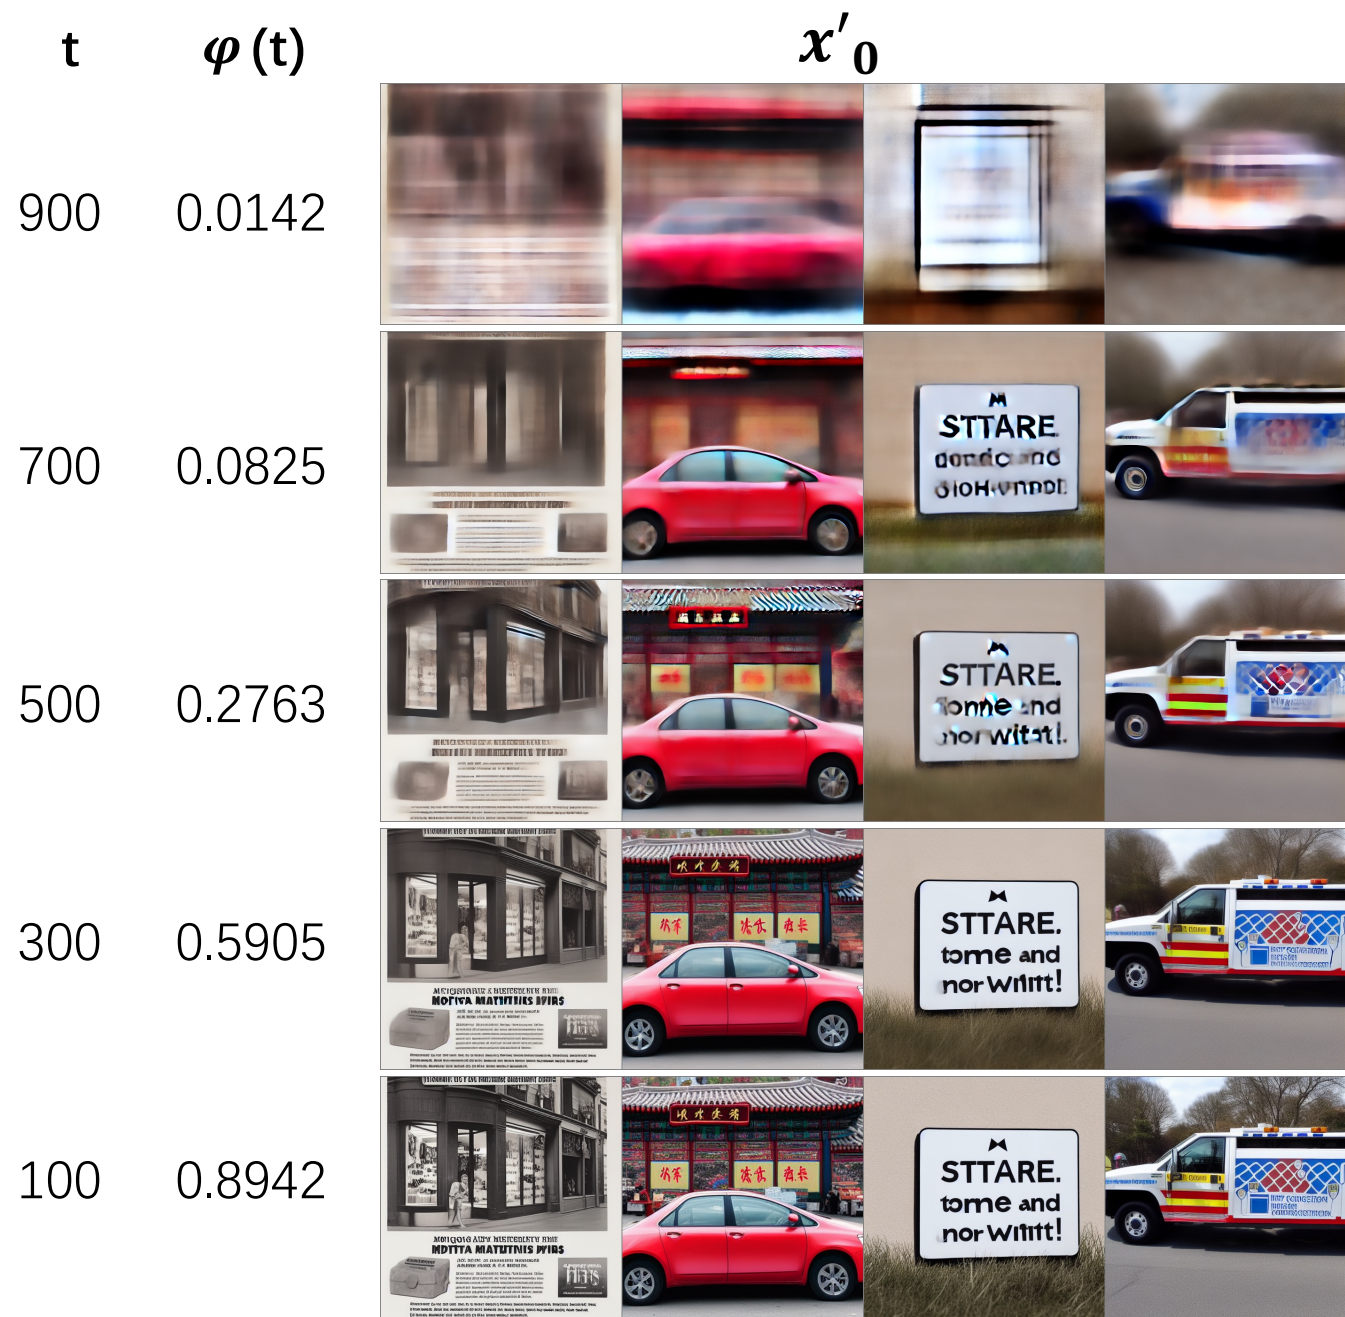

Figure 6: Visualization of  $x'_0$  at different time steps  $t$ , along with the values of the weight adjustment function  $\varphi(t)$ .

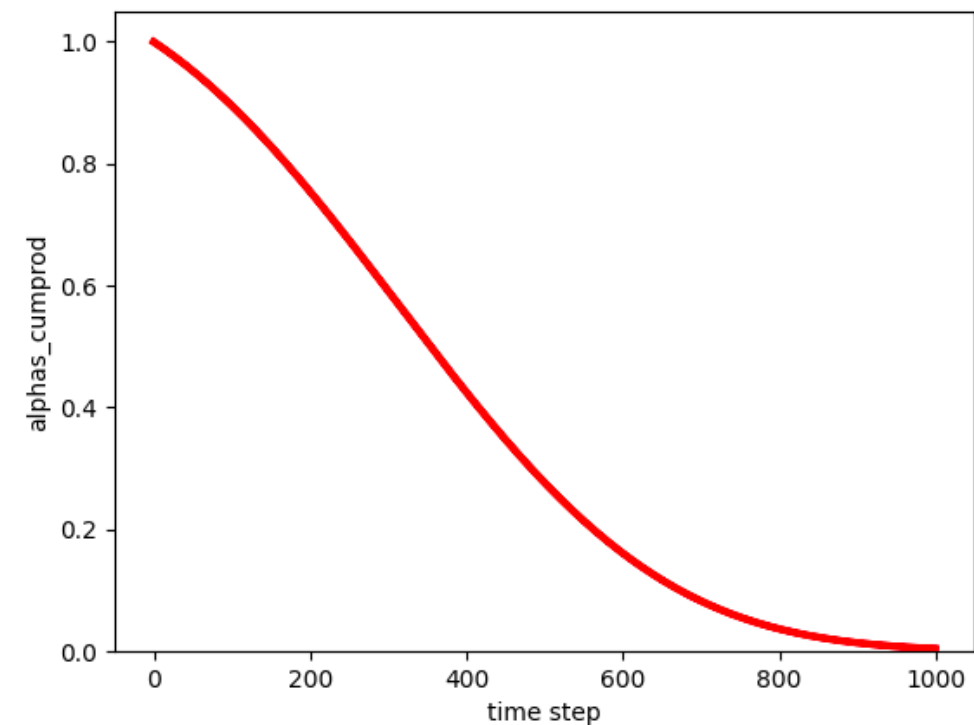

Figure 7: Curve depicting the changing of  $\bar{\alpha}_t$  with time step  $t$ .

## Training

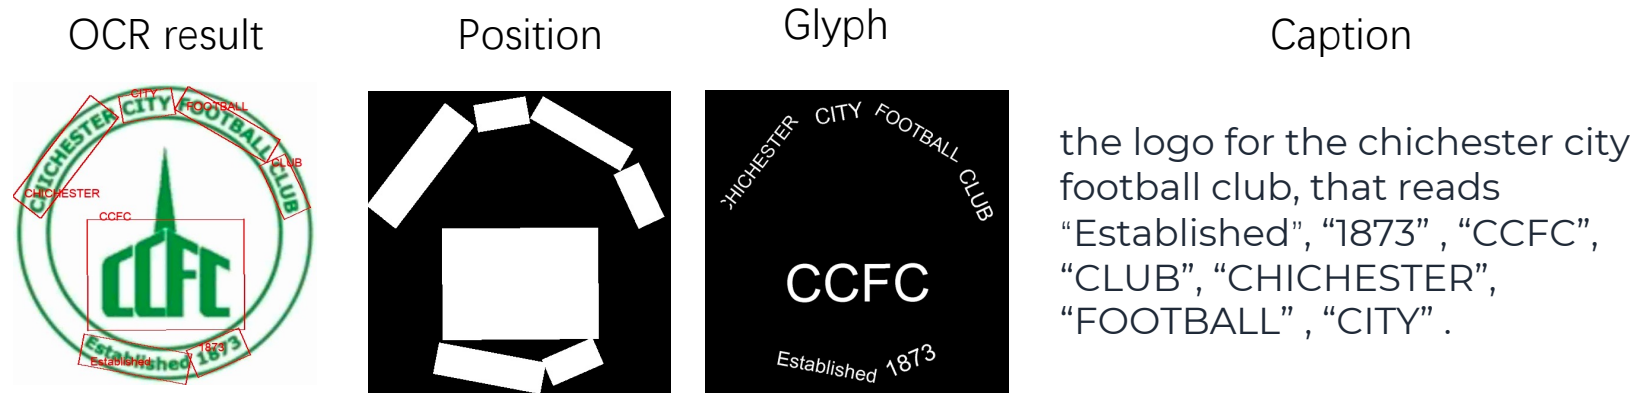

## Inference

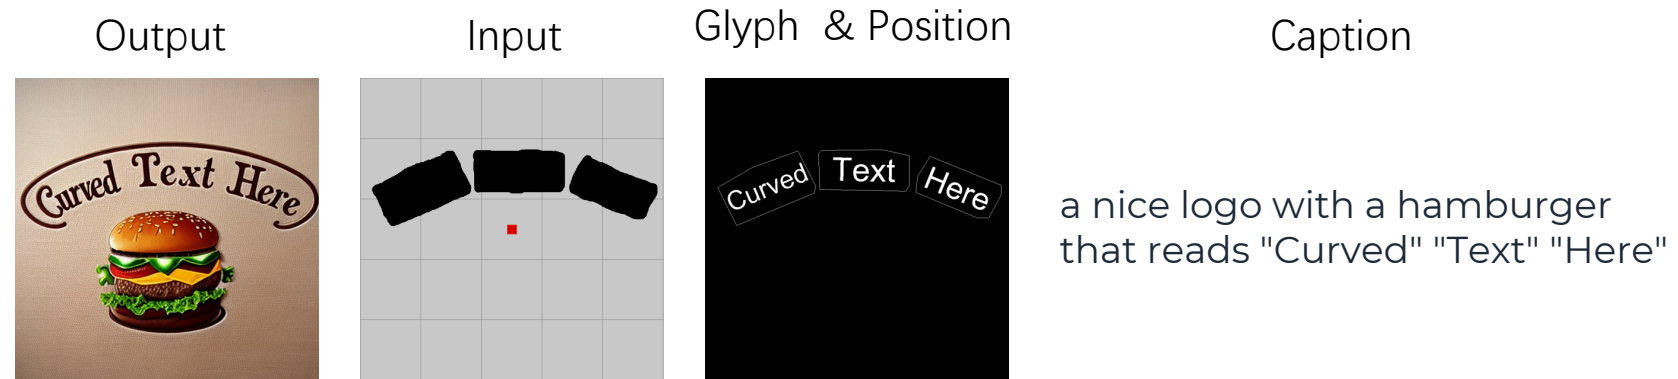

Figure 8: Illustration demonstrating how the model can learn the correspondence between curved rectangle bounding boxes and curved text.
